# Supplementary material
Source: PubMed Central journal article supplement (PMC2000504)
Supplement: pnas_0707490104_7.pdf [file pnas_0707490104_7.pdf]

**Table 2.** Sequence of the R8-11 ribozyme and of clones obtained at the start of continuous evolution (transfer 0) and after transfers 15, 50, 80, and 100

|              |                                                                                                                                      |
|--------------|--------------------------------------------------------------------------------------------------------------------------------------|
| <b>R8-11</b> | AGA-GAAGGAAACUCCCCAAUAGUGAUUUU-UGUGGU-UUU--UUGCGCAGUCUCAAUCCUAAGGC-AAACGCUAUGGAUCA AUGGGUAGGA (CCA) UCCGUUCCCUAGCA-GAC-UGCGCU-CC---- |
| 0-1          | .....G..... (N35) .....A.U.....                                                                                                      |
| 0-2          | .....-C.....U..... (N35) .....U.....U.C.....                                                                                         |
| 0-3          | .....G.....A.....-..... (N35) .....C.....U.....                                                                                      |
| 0-4          | .....A.....G..... (N35) .....C.....UA..C...                                                                                          |
| 0-5          | .....A.G..... (N35) .....C.....U.....                                                                                                |
| 0-6          | .....A..A..A..... (N35) .....U.U..C...                                                                                               |
| 0-7          | .....A.....C..... (N35) .....C.....U.....                                                                                            |
| 0-8          | G.....A.....C.....U..... (N35) .....U..U..U.....                                                                                     |
| 0-9          | .....C..... (N35) .....U..C.....U.....                                                                                               |
| 0-10         | .....-.....U..... (N35) .....U.....U.....                                                                                            |
| 0-11         | .....C.....C..... (N35) .....U.....U.....                                                                                            |
| 0-12         | .....U-..... (N35) .....C.A.....C...                                                                                                 |
| 15-1         | .....A..U.....-.....--U.....A..... (N35) .....U.U..C...                                                                              |
| 15-2         | .....A..U.....AU..... (N35) .....U.U..C...                                                                                           |
| 15-3         | .....A..U.....AA..GG..... (N35) A.....-G.....A.....C...                                                                              |
| 15-4         | .....A..U..... (N35) A.....U..C..U.U..C...                                                                                           |
| 15-5         | .....A..U.....AUA..... (N35) .....A.U.U..C...                                                                                        |
| 15-6*        | .....A..U..... (N35) .....A.U.U..C...                                                                                                |
| 15-7         | .....A..U.....AU.....UGA.....U-..... (N35) A.....U.U.....                                                                            |
| 15-8*        | .....A..U.....UGA..... (N35) A.....U.U..C...                                                                                         |
| 15-9         | .....A..U.....C.....A..... (N35) .....U..U.U..C...                                                                                   |
| 15-10        | .....A..U..... (N35) .....A.U.U..C...                                                                                                |
| 15-11        | .....A..U.....C..... (N35) .....AU.....C...                                                                                          |
| 15-12        | .....A..U.....C.....A.....U..... (N35) .....U.U..C...                                                                                |
| 15-13        | .....A..U.....U..... (N35) .....A..G..U.U..C...                                                                                      |
| 15-14        | .....A..U.....U.....UGA..... (N35) A.....U.U..C...                                                                                   |
| 15-15        | .....A..U.....U.....C.....A..... (N35) A.....U..C..U.U..C...                                                                         |
| 15-16        | .....A..U..... (N35) .....U.U..C...                                                                                                  |
| 15-17        | .....A..U.....C.....U..... (N35) .....A.U.U..C...                                                                                    |
| 15-18        | .....A..U.....-.....U.A..U..... (N35) A.....U..C..U.U..C...                                                                          |
| 15-19        | .....A..U.....-.....--U.....A..... (N35) .....U.U..C...                                                                              |
| 15-20        | .....A..U.....A..... (N35) .....U..C..U.U..C...                                                                                      |
| 15-21        | .....A..U.....AU.....U..... (N35) .....U.U..C...                                                                                     |
