# Supplementary material
Source: PubMed Central journal article supplement (PMC2000504)

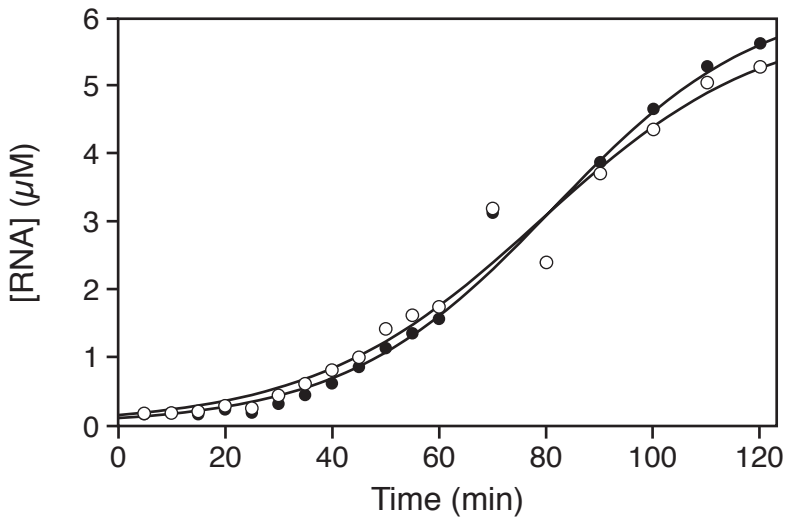

Supplement: pnas_0707490104_1.pdf [file pnas_0707490104_1.pdf]

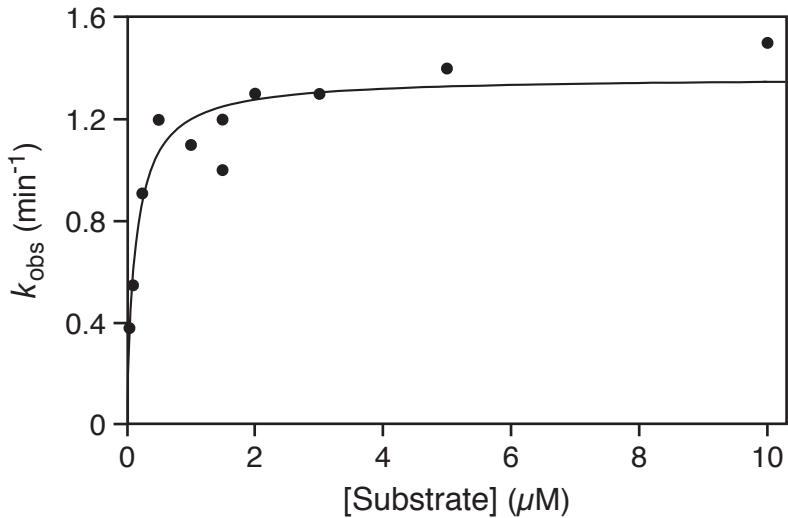

Supplement: pnas_0707490104_2.pdf [file pnas_0707490104_2.pdf]

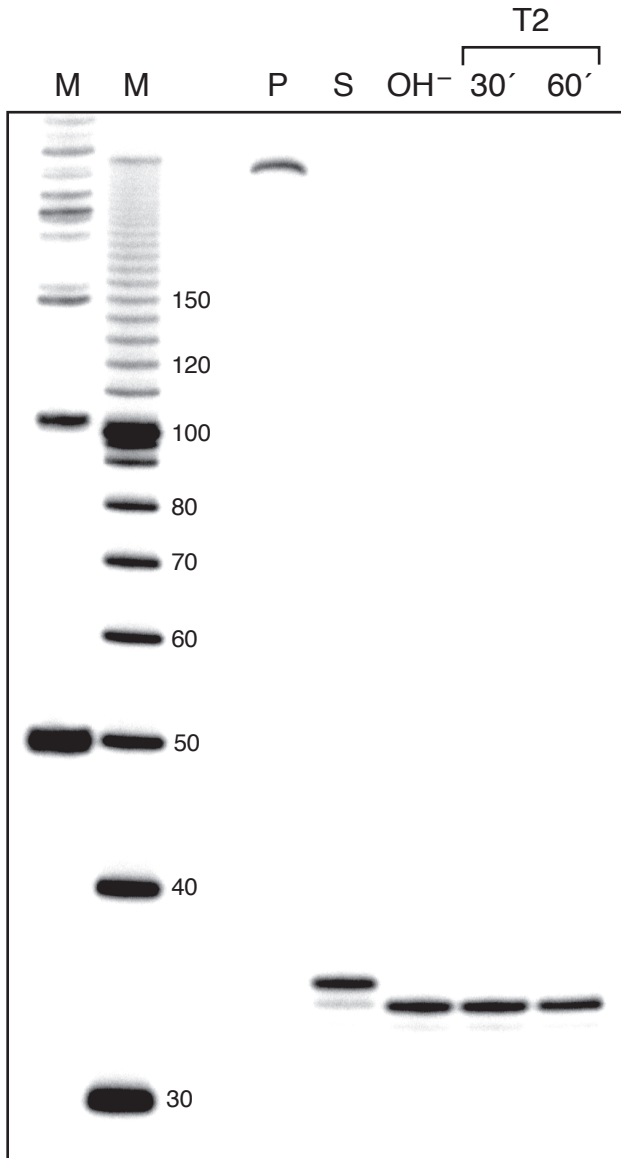

Supplement: pnas_0707490104_3.pdf [file pnas_0707490104_3.pdf]

**A**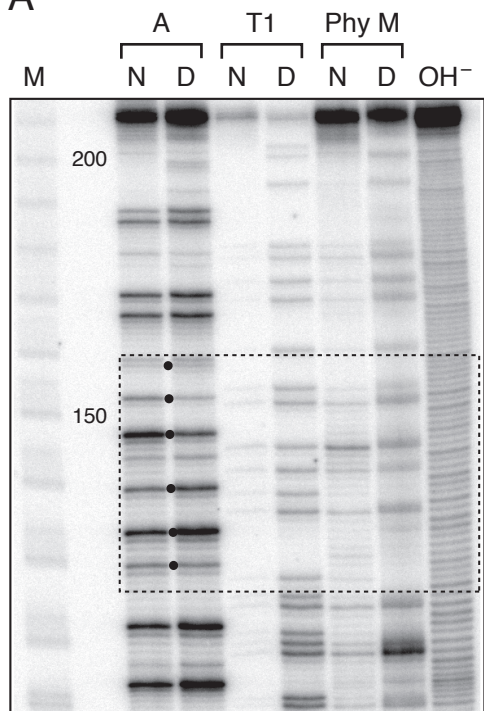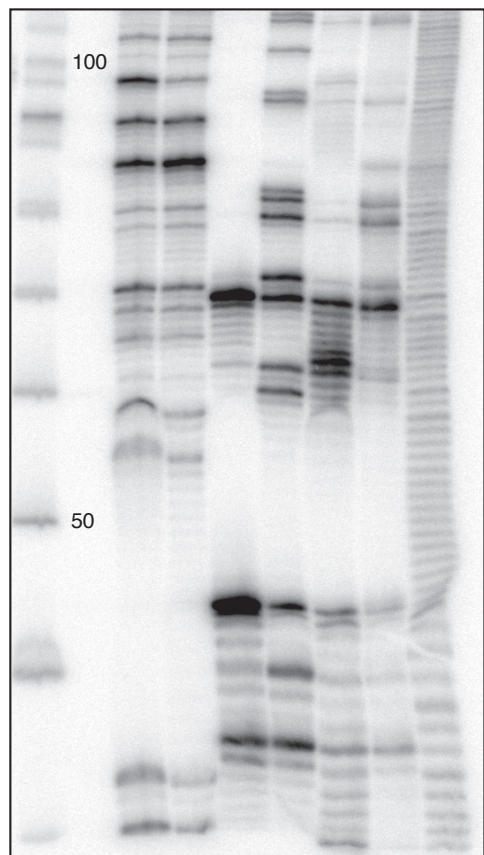**B**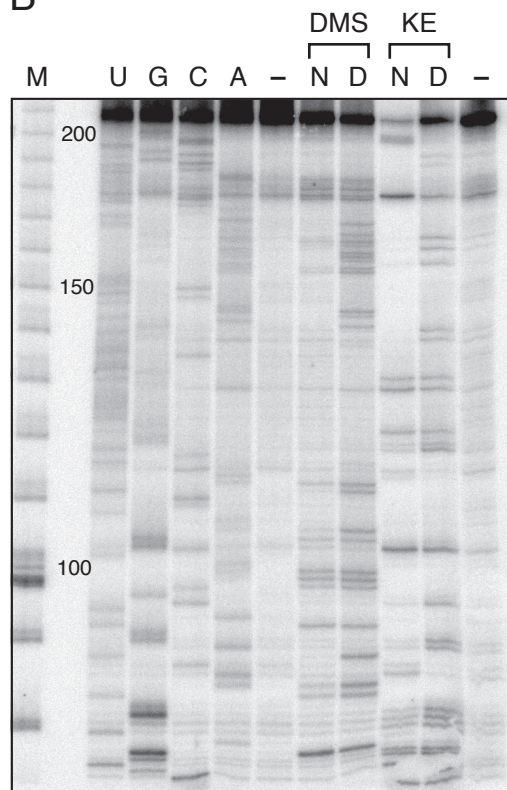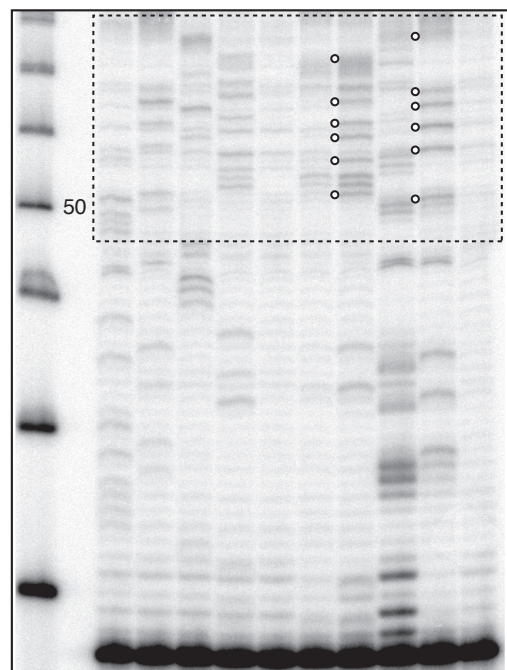

Supplement: pnas_0707490104_4.pdf [file pnas_0707490104_4.pdf]

T100-1

Mutant

$S^0$

$S^M$

$S^0$

$S^M$

$S^{DNA}$

$S^0 + S^{DNA}$

time

← 185 nt

← 167 nt

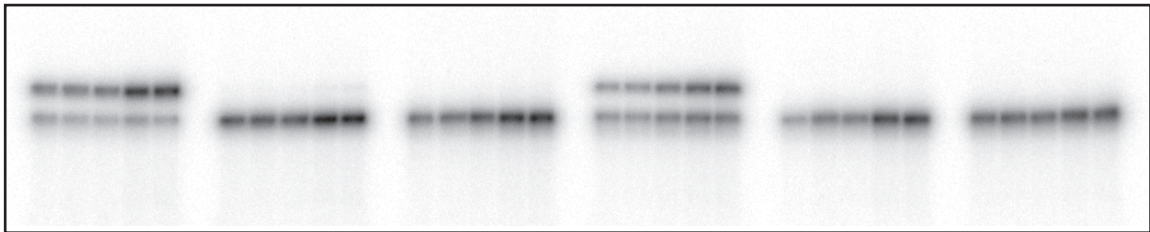

Supplement: pnas_0707490104_5.pdf [file pnas_0707490104_5.pdf]
